# Supplementary material for: A hundredfold enhancement of relaxation times among Er(iii) single-molecule magnets with comparable energy barriers
Source: Royal Society of Chemistry journal article supplement (doi:10.1039/d3qi01361h), 2023-01-01
Supplement: d3qi01361h1.pdf [file d3qi01361h1.pdf]

## **Supporting Information**

### **A Hundredfold Enhancement of Relaxation Times among Er(III) Single-Molecule Magnets with Comparable Energy Barriers**

Qi-Wei Chen,<sup>a,b</sup> You-Song Ding,<sup>b,c,\*</sup> Tianjiao Xue,<sup>b,c</sup> Xiao-Fei Zhu<sup>a,\*</sup> and Zhiping Zheng<sup>b,c,\*</sup>

<sup>a</sup> School of Chemistry and Life Science, Changchun University of Technology, Changchun 130012, China. zhuxiaofei@ccut.edu.cn

<sup>b</sup> Department of Chemistry, Southern University of Science and Technology, Shenzhen, Guangdong 518055, China. dingys@sustech.edu.cn; zhengzp@sustech.edu.cn.

<sup>c</sup> Key University Laboratory of Rare Earth Chemistry of Guangdong, Southern University of Science and Technology, Shenzhen, Guangdong 518055.

**Table S1** Comparison of the relaxation times for [K(18-C-6)][Er(COT)<sub>2</sub>], [K(18-C-6)(THF)<sub>2</sub>][Er(COT)<sub>2</sub>] [1] and **3**.

| [K(18-C-6)][Er(COT) <sub>2</sub> ] |          | [K(18-C-6)(THF) <sub>2</sub> ][Er(COT) <sub>2</sub> ] |          | <b>3</b> |          |
|------------------------------------|----------|-------------------------------------------------------|----------|----------|----------|
| 27.0                               | 1.81E-04 | 27.0                                                  | 1.83E-04 |          |          |
| 26.5                               | 2.17E-04 | 26.5                                                  | 2.20E-04 |          |          |
| 26.0                               | 2.61E-04 | 26.0                                                  | 2.63E-04 |          |          |
| 25.5                               | 3.13E-04 | 25.5                                                  | 3.17E-04 |          |          |
| 25.0                               | 3.80E-04 | 25.0                                                  | 3.82E-04 |          |          |
| 24.5                               | 4.60E-04 | 24.5                                                  | 4.64E-04 |          |          |
| 24.0                               | 5.62E-04 | 24.0                                                  | 5.66E-04 |          |          |
| 23.5                               | 6.87E-04 | 23.5                                                  | 6.93E-04 |          |          |
| 23.0                               | 8.48E-04 | 23.0                                                  | 8.55E-04 |          |          |
| 22.5                               | 0.00105  | 22.5                                                  | 0.00106  |          |          |
| 22.0                               | 0.00131  | 22.0                                                  | 0.00132  |          |          |
| 21.5                               | 0.00160  | 21.5                                                  | 0.00165  |          |          |
| 21.0                               | 0.00208  | 21.0                                                  | 0.00210  |          |          |
| 20.5                               | 0.00266  | 20.5                                                  | 0.00269  |          |          |
| 20.0                               | 0.00343  | 20.0                                                  | 0.00346  |          |          |
| 19.5                               | 0.00448  | 19.5                                                  | 0.00453  |          |          |
| 19.0                               | 0.00593  | 19.0                                                  | 0.00597  |          |          |
| 18.5                               | 0.00792  | 18.5                                                  | 0.00799  |          |          |
| 18.0                               | 0.01076  | 18.0                                                  | 0.01086  |          |          |
| 17.5                               | 0.01480  | 17.5                                                  | 0.01500  |          |          |
| 17.0                               | 0.02080  | 17.0                                                  | 0.02090  | 17       | 2.38E-04 |
| 16.5                               | 0.02970  | 16.5                                                  | 0.02980  | 16.5     | 3.04E-04 |
| 16.0                               | 0.04310  | 16.0                                                  | 0.04350  | 16       | 5.45E-04 |
| 15.5                               | 0.06400  | 15.5                                                  | 0.06400  | 15.5     | 8.21E-04 |
| 15.0                               | 0.09500  | 15.0                                                  | 0.09500  | 15       | 0.00109  |
| 14.5                               | 0.14700  |                                                       |          | 14.5     | 0.00187  |
| 14.0                               | 0.23400  |                                                       |          | 14       | 0.00283  |
| 13.5                               | 0.38600  |                                                       |          | 13.5     | 0.00439  |
| 13.0                               | 0.61900  |                                                       |          | 13       | 0.00705  |
|                                    |          |                                                       |          | 12.5     | 0.01172  |
|                                    |          |                                                       |          | 12       | 0.02053  |
|                                    |          |                                                       |          | 11       | 0.06574  |
|                                    |          |                                                       |          | 10       | 0.2222   |
|                                    |          |                                                       |          | 9        | 0.75414  |

**Table S2** Comparison of the relaxation times for  $[\text{K}(\text{DME})_2][\text{Er}(\text{COT}^{\text{TBS}2})_2]$ ,  $[\text{K}(18\text{-C-6})(\text{THF})_2][\text{Er}(\text{COT}^{\text{TBS}2})_2]$ ,  $[\text{K}(2,2,2\text{-cryptand})][\text{Er}(\text{COT}^{\text{TBS}2})_2]$  [2], **1** and **2**.

| $[\text{K}(\text{DME})_2][\text{Er}(\text{COT}^{\text{TBS}2})_2]$ | $[\text{K}(18\text{-C-6})(\text{THF})_2][\text{Er}(\text{COT}^{\text{TBS}2})_2]$ | $[\text{K}(2,2,2\text{-cryptand})][\text{Er}(\text{COT}^{\text{TBS}2})_2]$ | <b>2</b> |            |            |           |         |
|-------------------------------------------------------------------|----------------------------------------------------------------------------------|----------------------------------------------------------------------------|----------|------------|------------|-----------|---------|
|                                                                   |                                                                                  |                                                                            | 23       | 1.07842E-4 |            |           |         |
|                                                                   |                                                                                  |                                                                            | 22.5     | 1.49595E-4 |            |           |         |
|                                                                   |                                                                                  |                                                                            | 22       | 1.86232E-4 |            |           |         |
|                                                                   |                                                                                  |                                                                            | 21.5     | 1.98836E-4 |            |           |         |
| 21                                                                | 2.53E-04                                                                         |                                                                            | 21       | 2.52186E-4 |            |           |         |
|                                                                   |                                                                                  | 20.5                                                                       | 1.86E-04 | 20.5       | 3.251E-4   |           |         |
| 20                                                                | 4.26E-04                                                                         | 20                                                                         | 2.26E-04 | 20         | 3.98529E-4 |           |         |
|                                                                   |                                                                                  | 19.5                                                                       | 2.79E-04 | 19.5       | 5.2858E-4  |           |         |
|                                                                   |                                                                                  | 19                                                                         | 3.49E-04 | 19         | 6.71548E-4 |           |         |
|                                                                   | 18.5                                                                             | 1.81E-04                                                                   | 18.5     | 4.40E-04   | 18.5       | 9.1751E-4 |         |
| 18                                                                | 0.00137                                                                          | 18                                                                         | 2.30E-04 | 18         | 5.63E-04   | 18        | 0.00119 |
|                                                                   |                                                                                  | 17.5                                                                       | 3.06E-04 | 17.5       | 7.30E-04   | 17        | 0.00223 |
| 17                                                                | 0.00262                                                                          | 17                                                                         | 4.21E-04 | 17         | 9.65E-04   | 16        | 0.00456 |
|                                                                   |                                                                                  | 16.5                                                                       | 5.80E-04 | 16.5       | 0.0013     | 15        | 0.01018 |
| 16                                                                | 0.00537                                                                          | 16                                                                         | 8.29E-04 | 16         | 0.00179    |           |         |
|                                                                   |                                                                                  | 15.5                                                                       | 0.0012   | 15.5       | 0.00252    |           |         |
|                                                                   |                                                                                  | 15                                                                         | 0.00179  | 15         | 0.00367    | 15        | 0.01018 |
| 14                                                                | 0.02909                                                                          | 14                                                                         | 0.00406  | 14         | 0.00941    | 14        | 0.02544 |
|                                                                   |                                                                                  | 13                                                                         | 0.0106   | 13         | 0.02327    | 13        | 0.07019 |
| 12                                                                | 0.24433                                                                          | 12                                                                         | 0.0322   | 12         | 0.06939    |           |         |
|                                                                   |                                                                                  | 11                                                                         | 0.11581  | 11         | 0.27698    | 11        | 0.83004 |
|                                                                   |                                                                                  | 10                                                                         | 0.48177  |            |            |           |         |

**Table S3**, Reported Er-COT single molecule magnets with different substituted groups.

|                   | <i>R</i>                                                                                                    | Compound                                                                | $U_{\text{eff}} / \text{K}$ | $T_{\text{B}} / \text{K}$ | $T_{\text{H}} / \text{K}$ | Ref |
|-------------------|-------------------------------------------------------------------------------------------------------------|-------------------------------------------------------------------------|-----------------------------|---------------------------|---------------------------|-----|
| COT <sup>2-</sup> |                                                                                                             | [Cp*ErCOT]                                                              | 323 (0 Oe)<br>197 (0 Oe)    | 4.6                       | 5                         | 3   |
|                   |                                                                                                             | [K(18-C-6)][Er(COT) <sub>2</sub> ]                                      | 211 (0 Oe)                  | 10.1                      | 10                        | 1   |
|                   |                                                                                                             | [K(18-C-6)(THF) <sub>2</sub> ][Er(COT) <sub>2</sub> ]                   | 211 (0 Oe)                  | -                         | 10                        | 1   |
|                   |                                                                                                             | [K(18-C-6)][Er(COT) <sub>2</sub> ]                                      | 286 (0 Oe)                  | -                         | 12                        | 4   |
|                   |                                                                                                             | K <sub>2</sub> (THF) <sub>4</sub> [Er <sub>2</sub> (COT) <sub>4</sub> ] | 306 (0 Oe)                  | 12.9                      | 12                        | 5   |
|                   |                                                                                                             | [(C <sub>5</sub> H <sub>5</sub> BH)Er(COT)]                             | 371 (0 Oe)                  | -                         | 8                         | 6   |
|                   |                                                                                                             | [(C <sub>5</sub> H <sub>5</sub> BMe)Er(COT)]                            | 421 (0 Oe)                  | -                         | 6                         | 6   |
|                   |                                                                                                             | [(C <sub>5</sub> H <sub>5</sub> BNEt <sub>2</sub> )Er(COT)]             | 250 (0 Oe)                  | -                         | -                         | 6   |
|                   |                                                                                                             | [Er(μ <sub>2</sub> -Cl)(COT)(THF) <sub>2</sub> ]                        | 162 (0 Oe)                  | -                         | 4                         | 7   |
|                   |                                                                                                             | [{(S)-PETA}Er(COT)(THF)]                                                | 50 (0 Oe)                   | -                         | -                         | 8   |
|                   |                                                                                                             | (Dsp)Er(COT)                                                            | 358                         | 8.5                       | 9                         | 9   |
|                   |                                                                                                             | Er(COT)I(THF) <sub>2</sub>                                              | 137 (0 Oe)                  |                           |                           | 10  |
|                   |                                                                                                             | Er(COT)I(Py) <sub>2</sub>                                               | 148 (0 Oe)                  |                           |                           | 10  |
|                   |                                                                                                             | Er(COT)I(MeCN) <sub>2</sub>                                             | 154 (0 Oe)                  |                           |                           | 10  |
|                   |                                                                                                             | Er(COT)(Tp*)                                                            | 192 (0 Oe)                  |                           |                           | 10  |
|                   |                                                                                                             | Er(COT)I(DMPE)                                                          | 108 (0 Oe)                  | -                         | -                         | 11  |
|                   |                                                                                                             | [Er(COT)(μ-I)] <sub>2</sub> (μ-DPPE)                                    | 264 (0 Oe)                  | -                         | -                         | 11  |
|                   |                                                                                                             | [Er(COT)(μ-I)] <sub>2</sub> (μ-DPPM)                                    | 290 (0 Oe)                  | -                         | -                         | 11  |
|                   |                                                                                                             | [Er(COT)(μ-I)(MDPP)] <sub>2</sub>                                       | 253 (0 Oe)                  | -                         | -                         | 11  |
|                   |                                                                                                             | [(LOMe)Er(COT)]                                                         | 111                         |                           |                           | 12  |
|                   |                                                                                                             | [(THF) <sub>2</sub> (OAr)Er(COT)]                                       | 55                          |                           |                           | 12  |
|                   |                                                                                                             | [(C <sub>9</sub> H <sub>9</sub> )Er(COT)]                               | 361 (0 Oe)                  | -                         | 10                        | 13  |
|                   |                                                                                                             | [Er(COT)(μ-OEt)(THF)] <sub>2</sub>                                      | 27 (0 Oe)<br>52 (800 Oe)    | -                         | -                         | 14  |
|                   |                                                                                                             | [Er(COT)] <sub>2</sub> (μ-O'Bu) <sub>2</sub> (THF)                      | 9 (0 Oe)<br>31 (2 kOe)      | -                         | -                         | 14  |
|                   |                                                                                                             | [Li(DME) <sub>3</sub> ][BoEr(COT)]                                      | 157 (0 Oe)                  |                           | 2                         | 15  |
|                   |                                                                                                             | [ErKCa(COT) <sub>3</sub> (THF) <sub>3</sub> ]                           | 287 (0 Oe)                  | -                         | 10                        | 16  |
|                   | (COT)Er(Cp <sup>tt</sup> )                                                                                  | 228 (0 Oe)                                                              |                             |                           | 17                        |     |
|                   | [Er(THF) <sub>3</sub> (COT)][C <sub>9</sub> H <sub>9</sub> ]                                                | 97 (0 Oe)                                                               |                             |                           | 18                        |     |
| COT <sup>R2</sup> | TMS                                                                                                         | [Li(DME) <sub>3</sub> ][Er(COT <sup>TMS2</sup> ) <sub>2</sub> ]         | 187 (0 Oe)                  | 8                         | 8                         | 19  |
|                   |                                                                                                             | [Er <sub>2</sub> (COT <sup>TMS2</sup> ) <sub>3</sub> ]                  | 323 (0 Oe)                  | 12.5                      | 14                        | 5   |
|                   | TIPS                                                                                                        | [Li(THF)(L <sup>Pb</sup> )Er(COT <sup>TIPS2</sup> )]                    | 145 (0 Oe)                  | 6.1                       | 6.1                       | 20  |
|                   |                                                                                                             | [Li(12-C-4) <sub>2</sub> (L <sup>Pb</sup> )Er(COT <sup>TIPS2</sup> )]   | 61 (0 Oe)                   | 2.8                       | 2.8                       | 20  |
|                   |                                                                                                             | Er(COT <sup>TIPS2</sup> )I(THF) <sub>2</sub>                            | 118 (0 Oe)                  | -                         | -                         | 21  |
|                   |                                                                                                             | [Er(COT <sup>TIPS2</sup> (μ-I)(THF)] <sub>2</sub>                       | 198 (0 Oe)<br>218 (0 Oe)    | -                         | -                         | 21  |
|                   | [Er <sub>3</sub> (COT <sup>TIPS2</sup> ) <sub>3</sub> (μ <sub>2</sub> -I)(μ <sub>3</sub> -I) <sub>2</sub> ] | 200 (0 Oe)                                                              | -                           | -                         | 21                        |     |

|                   |     |                                                                        |            |    |    |    |
|-------------------|-----|------------------------------------------------------------------------|------------|----|----|----|
|                   |     |                                                                        | 243 (0 Oe) |    |    |    |
|                   |     |                                                                        | 282 (0 Oe) |    |    |    |
|                   | TBS | [K(DME) <sub>2</sub> ][Er(COT <sup>TBS2</sup> ) <sub>2</sub> ]         | 190 (0 Oe) | 10 | 10 | 2  |
|                   |     | [K(18-C-6)(THF) <sub>2</sub> ][Er(COT <sup>TBS2</sup> ) <sub>2</sub> ] | 171 (0 Oe) | 9  | 9  | 2  |
|                   |     | [K(2,2,2-cryptand)][Er(COT <sup>TBS2</sup> ) <sub>2</sub> ]            | 166 (0 Oe) | 9  | 11 | 2  |
| COT <sup>R4</sup> | hex | [K(18-C-6)][Er(hdcCOT) <sub>2</sub> ]                                  | 212 (0 Oe) | -  | -  | 22 |

### Abbreviation

Cp\* = pentamethylcyclopentadienide

18-C-6 = 18-Crown-6

(*S,S*)-PETA = (*S,S*)-*N,N'*-bis(1-phenylethyl) pivalamidinate

Dsp<sup>-</sup> = 3,4-dimethyl-2,5-bis(trimethylsilyl)phospholyl

Py = pyridine

MeCN = acetonitrile

Tp\* = tris(3,5-dimethyl-1-pyrazolyl)borate

DMPE = 1,2-bis(dimethylphosphino)ethane

DPPE = 1,2-bis(diphenylphosphino)ethane

DPPM = 1,2-bis(diphenylphosphino)methane

MDPP = methyldiphenylphosphine

LOMe = [(η<sup>5</sup>-C<sub>5</sub>H<sub>5</sub>)Co{P(=O)(OMe)<sub>2</sub>}]<sub>3</sub>, COT = cyclooctatetraenyl

Ar = 2,6-Dipp<sub>2</sub>C<sub>6</sub>H<sub>3</sub>, Dipp = 2,6-diisopropylphenyl

Bo = benzoborole dianion

(Cp<sup>ttt</sup>)<sup>-</sup> = 1,2,4-tri(*tert*-butyl)cyclopentadienide

L<sup>Pb</sup> = 1,4-bis-*tert*-butyl-dimethylsilyl-2,3-bis-phenyl-plumbolyl

COT<sup>TIPS2</sup> = 1,4-bis-triisopropylsilyl-cyclooctatetraenyl

12-C-4 = 12-Crown-4

COT<sup>TBS2</sup> = 1,4-(*t*BuMe<sub>2</sub>Si)<sub>2</sub>C<sub>8</sub>H<sub>6</sub>

hdcCOT = hexahydrodicyclopentacyclooctatetraenide dianion

## General synthetic consideration

All manipulations are carried out under standard Schlenk techniques or glove box under an argon atmosphere. All glassware was dried overnight at 120°C before use. Anhydrous THF was purchased from energy-chemical, while n-hexane was dried using activated alumina and stored over Potassium mirror before use. Anhydrous  $\text{ErCl}_3$  [23], cyclooctatetraene (COT) [24], bromocyclooctatetraene (BrCOT) [25], Trimethylsilylcyclooctatetraene ( $\text{COT}^{\text{TMS}1}$ ) [26], 5,8-bis(trimethylsilyl)-1,3,6-cyclooctatriene ( $\text{H}_2\text{COT}^{\text{TMS}2}$ ) [27]), and 1,3,6,6-tetrakis(trimethylsilyl)cyclooctatriene ( $\text{COT}^{\text{TMS}4}$ ) [27] were synthesized using a previously published procedure. All other reagents were purchased from energy-chemical and used without further purification. Elemental analyses were recorded on a Carlo Erba EA1110 simultaneous CHN elemental analyzer. FT-IR spectra were recorded in the range 600 - 4000  $\text{cm}^{-1}$  on a Bruker tensor II spectrophotometer with ATR mode.

## Synthesis

Scheme S1 synthesis of the three Cyclooctatetraenide dianions.

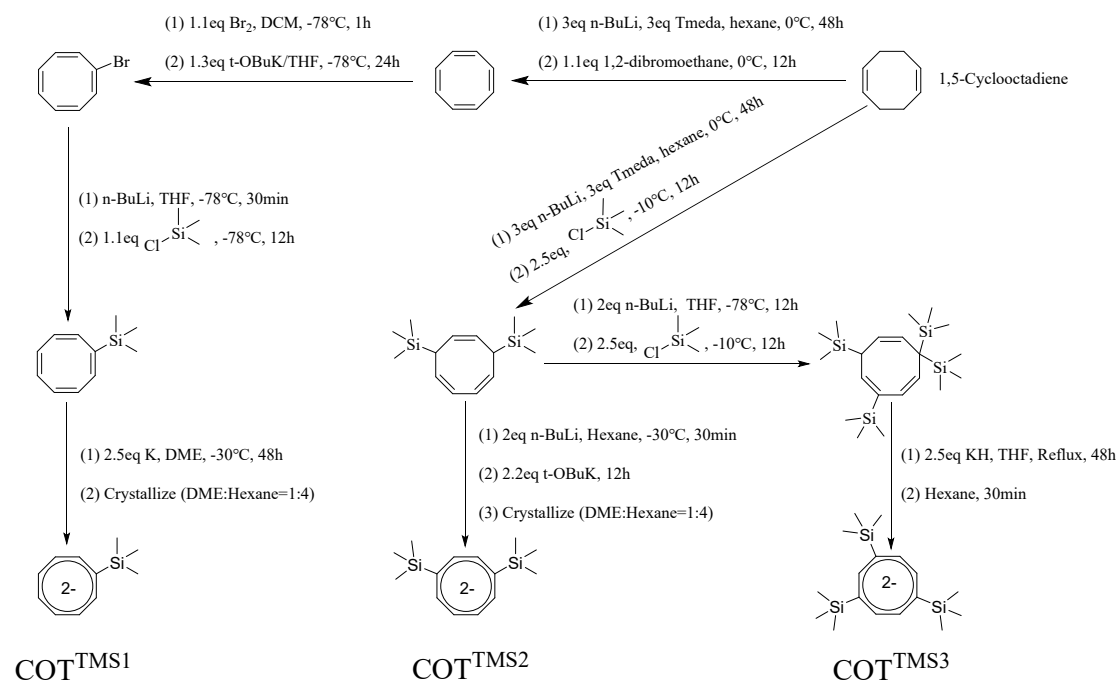

## Experimental Section

### The synthesis of $\text{K}_2(\text{DME})_2\text{COT}^{\text{TMS}1}$ ( $\text{K}_2(\text{COT}^{\text{TMS}1})$ )

Complex  $\text{K}_2(\text{COT}^{\text{TMS}1})$  was prepared by following the typical procedure to reduce COT [28]. Under argon atmosphere,  $\text{COT}^{\text{TMS}}$  (5.28 g, 30 mmol) was added to a solution of freshly cut potassium (2.93 g, 75 mmol) in DME (60 mL) at  $-30\text{ }^\circ\text{C}$ . The temperature was then slowly rise to room temperature and the dark red solution was stirred for 48 hours. The mixture was filtrated in the glovebox to remove excess potassium. Colorless crystals for  $\text{K}_2(\text{COT}^{\text{TMS}1})$  was obtained in the mixed solution of DME and hexane (1:4) with the yield of 37%. Found: C, 52.2; H, 8.5. Calc. for  $\text{C}_{19}\text{H}_{36}\text{K}_2\text{O}_4\text{Si}$ : C, 52.5; H, 8.5%.

### The synthesis of $\text{K}_2(\text{DME})_2\text{COT}^{\text{TMS}2}$ ( $\text{K}_2(\text{COT}^{\text{TMS}2})$ )

Complex  $\text{K}_2(\text{COT}^{\text{TMS}2})$  was prepared according to the literature procedure with slight modifications as follow [20]. Under argon atmosphere, *n*-BuLi (25.5 mL, 63.86 mmol) was added to dry hexane (100 mL) solution of  $\text{H}_2\text{COT}^{\text{TMS}2}$  (8 g, 31.93 mmol) at  $-30\text{ }^\circ\text{C}$  and stirred for 30 minutes.  $\text{KO}^t\text{Bu}$  (7.88 g, 70.25 mmol) was then added to the mixture. The resulting solution was stirred overnight at the room temperature. The mixture was then filtrated and the residue was then washed with plenty of hexane solution until the filtrate become colorless. Recrystallization of the residue from mixed solution of DME and hexane (1:4) yield colorless crystals for  $\text{K}_2(\text{COT}^{\text{TMS}2})$ . Yield 55%. Found: C, 51.6; H, 9.3. Calc. for  $\text{C}_{22}\text{H}_{44}\text{K}_2\text{O}_4\text{Si}_2$ : C, 52.1; H, 8.8%. Note: The 1,4-silylate COT in  $\text{K}_2(\text{COT}^{\text{TMS}2})$  changed to the 1,3-analogue  $\text{K}_2(\text{COT}^{\text{TMS}2})$ , which also taken place when prepared by reaction of  $\text{H}_2\text{COT}^{\text{TMS}2}$  with KH [29].

### The synthesis of $\text{K}_2(\text{THF})_3\text{COT}^{\text{TMS}3}$ ( $\text{K}_2(\text{COT}^{\text{TMS}3})$ )

Complex  $\text{K}_2(\text{COT}^{\text{TMS}3})$  was prepared according to the literature procedure [27]. At the argon atmosphere, KH (4.44 g, 110.79 mmol) was added to the solution of  $\text{H}_2\text{COT}^{\text{TMS}4}$  (17.50 g, 44.32 mmol) in dry THF (100 mL) at room temperature, and then the mixture was heated to reflux for 48 hours. Subsequently, excess KH was filtered off, the solvent was removed under vacuum, and the residue taken up in hexane (40 mL) and stirred for 3 hours. The white solid precipitate was separated with the yield of 36%. Colorless crystals for  $\text{K}_2(\text{COT}^{\text{TMS}3})$  were obtained by diffraction of hexane

to saturated THF solution of  $\mathbf{K}_2(\text{COT}^{\text{TMS}3})$  at room temperature. Found: C, 56.5; H, 9.1. Calc. for  $\text{C}_{29}\text{H}_{56}\text{K}_2\text{O}_3\text{Si}_3$ : C, 56.6; H, 9.2%.

#### **The synthesis of $(\text{COT}^{\text{TMS}})\text{Er}(\text{COT}^{\text{TMS}})\text{K}(\text{DME})_2$ (**1**)**

At the argon atmosphere,  $\text{ErCl}_3$  (0.134 g, 0.5 mmol) and  $\mathbf{K}_2(\text{COT}^{\text{TMS}1})$  (0.434 g, 1 mmol) was dispersed in DME (10 mL) and stirred for 48 hours at room temperature. After filtration, the solvent was removed under vacuum, and the residue was washed with hexane and then dissolved in DME (*ca.* 1 mL). The solution was cooled to  $-35$  °C overnight to give orange crystals for **1** that collected by filtration. The yield is 39%. IR:  $\nu$  [ $\text{cm}^{-1}$ ] = 3037 (w), 2944 (w), 2892 (w), 1561 (w), 1499 (w), 1443 (w), 1400 (w), 1375 (w), 1243 (s), 1181 (w), 1023 (m), 925 (m), 831 (s), 811 (m), 748 (m), 702 (s), 630 (m), 585 (w), 536 (w). Found: C, 49.2; H, 6.6. Calc. for  $\text{C}_{30}\text{H}_{52}\text{ErKO}_4\text{Si}_2$ : C, 48.7; H, 7.1%.

#### **The synthesis of $(\text{COT}^{\text{TMS}2})\text{Er}(\text{COT}^{\text{TMS}2})\text{K}(\text{DME})_2$ (**2**)**

Complex **2** was prepared by the same method as **1**, using  $\text{ErCl}_3$  (0.134 g, 0.5 mmol) and  $\mathbf{K}_2(\text{COT}^{\text{TMS}2})$  (0.506 g, 1 mmol). Orange crystals of **2** were obtained by cooling saturated DME solution of **2** overnight. The yield is 36%. IR:  $\nu$  [ $\text{cm}^{-1}$ ] = 3038 (w), 2949 (w), 2895 (w), 1441 (w), 1401 (w), 1244 (s), 1210 (w), 1047 (s), 979 (w), 931 (m), 907 (w), 825 (s), 782 (w), 731 (s), 682 (m), 631 (m), 551 (m). Found: C, 48.8; H, 8.0. Calc. for  $\text{C}_{36}\text{H}_{67}\text{ErKO}_4\text{Si}_4$ : C, 49.0; H, 7.7%. Note: 1,3- silylate COT in  $\mathbf{K}_2(\text{COT}^{\text{TMS}2})$  changed backed to the 1,4-analogue when coordinated to the lanthanide ions, probably because the TMS groups can wander to neighbor carbon when coordinated to lanthanide ions [30].

#### **The synthesis of $[(\text{COT}^{\text{TMS}3})\text{Er}(\text{COT}^{\text{TMS}3})\text{K}(\text{18-Crown-6})_{1.5}(\text{DME})] \cdot \text{DME}$ (**3**)**

At the argon atmosphere,  $\text{ErCl}_3$  (0.134 g, 0.5 mmol) and  $\mathbf{K}_2(\text{COT}^{\text{TMS}3})$  (0.506 g, 1 mmol) was dispersed in DME (10 mL) and stirred for 24 hours at  $80$  °C. After filtration, 18-crown-6 (0.264 g, 1 mmol) was added to the filtrate and the mixture was stirred at room temperature overnight. The mixture was filtrated again and the solvent was removed under vacuum. The residue was washed with hexane and then dissolved in DME (1 mL). The DME solution was cooled to  $-35$  °C overnight to yield orange crystals of **3**. The yield is 26%. IR:  $\nu$  [ $\text{cm}^{-1}$ ] = 3016 (w), 2946 (w), 2892 (w), 1536 (w),



1471 (w), 1452 (w), 1402 (w), 1350 (w), 1284 (w), 1239 (m), 1102 (s), 1069 (m), 983 (w), 960 (w), 935 (w), 863 (w), 825 (s), 744 (s), 677 (w), 634 (m), 548 (w), 529 (w), 508 (w). Found: C, 50.9; H, 8.6. Calc. for  $C_{60}H_{19}ErKO_{13}Si_6$ : C, 50.6; H, 8.4%.

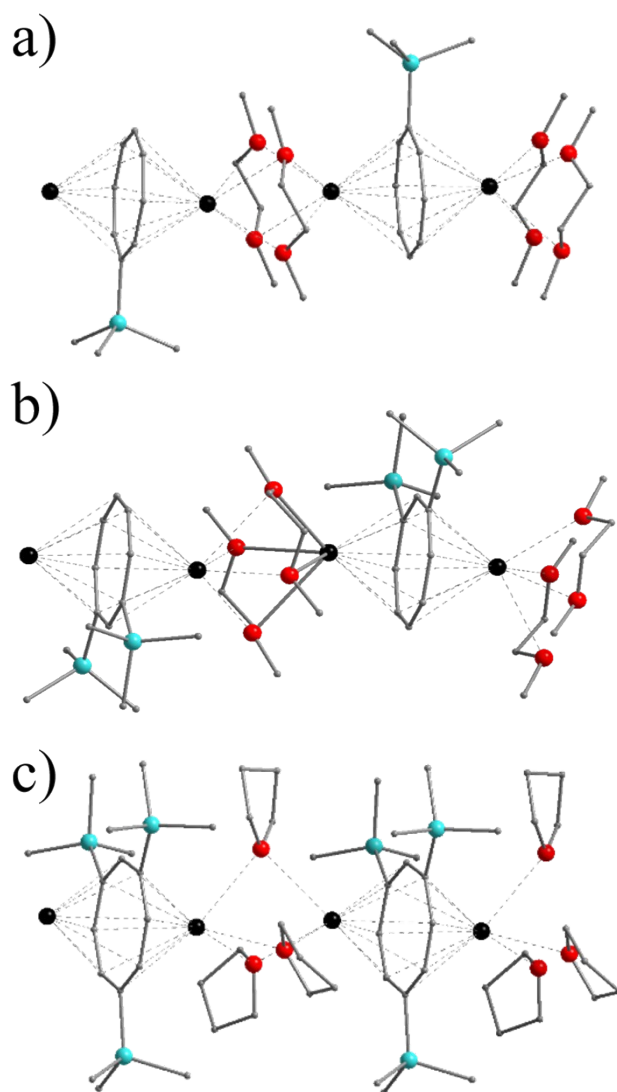

**Figure S1** The crystal structure of complexes  $K_2(COT^{TMS1})$  (a),  $K_2(COT^{TMS2})$  (b) and  $K_2(COT^{TMS3})$  (c). Other atoms are omitted for clarity. Colour code: dark red (K), red (O), orange (Si), white (C).

## Crystallography

Single-crystal X-ray diffraction studies were carried out with the use of a Bruker D8 VENTURE diffractometer with Mo-K $\alpha$  radiation ( $\lambda = 0.71073 \text{ \AA}$ ) at 100 K. Using Olex2 [31], the structures were solved with the SHELXT [32] structure solution program using Intrinsic Phasing and refined with the SHELXL [33] refinement package using Least Squares minimization. All hydrogen atom positions were generated geometrically and refined with isotropic temperature factors. Cambridge Crystallographic Data Centre contains the crystal structure with the following CCDC number 2262226 ( $\text{K}_2(\text{COT}^{\text{TMS1}})$ ), 2262227 ( $\text{K}_2(\text{COT}^{\text{TMS2}})$ ), 2262228 ( $\text{K}_2(\text{COT}^{\text{TMS3}})$ ), 2262229 (**1**), 2262230 (**2**), and 2262231 (**3**).

**Table S4** Crystallographic Data and Structure Refinements for  $\text{K}_2(\text{COT}^{\text{TMS1}})$ ,  $\text{K}_2(\text{COT}^{\text{TMS2}})$  and  $\text{K}_2(\text{COT}^{\text{TMS3}})$ .

| Complexes                                              | $\text{K}_2(\text{COT}^{\text{TMS1}})$                    | $\text{K}_2(\text{COT}^{\text{TMS2}})$                      | $\text{K}_2(\text{COT}^{\text{TMS3}})$                      |
|--------------------------------------------------------|-----------------------------------------------------------|-------------------------------------------------------------|-------------------------------------------------------------|
| Empirical formula                                      | $\text{C}_{19}\text{H}_{36}\text{K}_2\text{O}_4\text{Si}$ | $\text{C}_{22}\text{H}_{44}\text{K}_2\text{O}_4\text{Si}_2$ | $\text{C}_{29}\text{H}_{56}\text{K}_2\text{O}_3\text{Si}_3$ |
| Formula weight                                         | 434.77                                                    | 506.95                                                      | 615.20                                                      |
| Temperature/K                                          | 100.00                                                    | 99.99                                                       | 100.00                                                      |
| Crystal system                                         | orthorhombic                                              | orthorhombic                                                | orthorhombic                                                |
| Space group                                            | <i>Pnma</i>                                               | <i>Pnma</i>                                                 | <i>P2<sub>1</sub>2<sub>1</sub>2<sub>1</sub></i>             |
| <i>a</i> / $\text{\AA}$                                | 16.5310(6)                                                | 9.3885(10)                                                  | 8.6162(3)                                                   |
| <i>b</i> / $\text{\AA}$                                | 14.1823(6)                                                | 16.5709(9)                                                  | 20.3535(10)                                                 |
| <i>c</i> / $\text{\AA}$                                | 10.1672(4)                                                | 18.6126(12)                                                 | 20.3682(10)                                                 |
| $\alpha$ / $^\circ$                                    | 90                                                        | 90                                                          | 90                                                          |
| $\beta$ / $^\circ$                                     | 90                                                        | 90                                                          | 90                                                          |
| $\gamma$ / $^\circ$                                    | 90                                                        | 90                                                          | 90                                                          |
| Volume/ $\text{\AA}^3$                                 | 2383.68(16)                                               | 2895.7(4)                                                   | 3572.0(3)                                                   |
| <i>Z</i>                                               | 4                                                         | 4                                                           | 4                                                           |
| $\rho_{\text{calc}}/\text{g/cm}^3$                     | 1.211                                                     | 1.163                                                       | 1.144                                                       |
| $\mu/\text{mm}^{-1}$                                   | 0.467                                                     | 0.432                                                       | 0.391                                                       |
| Crystal size/ $\text{mm}^3$                            | $0.4 \times 0.3 \times 0.1$                               | $0.4 \times 0.4 \times 0.1$                                 | $0.4 \times 0.3 \times 0.2$                                 |
| Radiation                                              | MoK $\alpha$ ( $\lambda = 0.71073$ )                      | MoK $\alpha$ ( $\lambda = 0.71073$ )                        | MoK $\alpha$ ( $\lambda = 0.71073$ )                        |
| $\theta_{\text{min}}, \theta_{\text{max}}, \text{deg}$ | 4.928, 55.088                                             | 4.916, 54.972                                               | 4.474, 55.062                                               |
| Final <i>R</i> indexes [ $I \geq 2\sigma(I)$ ]         | $R_1 = 0.0334$                                            | $R_1 = 0.0305$                                              | $R_1 = 0.0465$                                              |
| Final <i>R</i> indexes [all data]                      | $wR_2 = 0.1082$                                           | $wR_2 = 0.0754$                                             | $wR_2 = 0.1095$                                             |

**Table S5** Crystallographic Data and Structure Refinements for **1 - 3**

| <b>Complexes</b>                                              | <b>1</b>                                                          | <b>2</b>                                                          | <b>3</b>                                                            |
|---------------------------------------------------------------|-------------------------------------------------------------------|-------------------------------------------------------------------|---------------------------------------------------------------------|
| Empirical formula                                             | C <sub>30</sub> H <sub>52</sub> ErKO <sub>4</sub> Si <sub>2</sub> | C <sub>36</sub> H <sub>67</sub> ErKO <sub>4</sub> Si <sub>4</sub> | C <sub>60</sub> H <sub>120</sub> ErKO <sub>13</sub> Si <sub>6</sub> |
| Formula weight                                                | 739.25                                                            | 883.62                                                            | 1424.45                                                             |
| Temperature/K                                                 | 100.00                                                            | 100.01                                                            | 102.99                                                              |
| Crystal system                                                | monoclinic                                                        | orthorhombic                                                      | monoclinic                                                          |
| Space group                                                   | <i>P</i> 2 <sub>1</sub> / <i>c</i>                                | <i>F</i> dd2                                                      | <i>P</i> 2 <sub>1</sub> / <i>n</i>                                  |
| <i>a</i> /Å                                                   | 12.7167(5)                                                        | 36.8885(14)                                                       | 9.9662(7)                                                           |
| <i>b</i> /Å                                                   | 13.3493(5)                                                        | 38.9549(15)                                                       | 22.897(3)                                                           |
| <i>c</i> /Å                                                   | 20.2555(7)                                                        | 12.4524(5)                                                        | 33.0980(19)                                                         |
| <i>α</i> /°                                                   | 90                                                                | 90                                                                | 90                                                                  |
| <i>β</i> /°                                                   | 99.8330(10)                                                       | 90                                                                | 94.914(4)                                                           |
| <i>γ</i> /°                                                   | 90                                                                | 90                                                                | 90                                                                  |
| Volume/Å <sup>3</sup>                                         | 3388.0(2)                                                         | 17893.9(12)                                                       | 7525.0(11)                                                          |
| <i>Z</i>                                                      | 4                                                                 | 16                                                                | 4                                                                   |
| $\rho_{\text{calc}}$ /cm <sup>3</sup>                         | 1.449                                                             | 1.312                                                             | 1.257                                                               |
| $\mu$ /mm <sup>-1</sup>                                       | 2.701                                                             | 2.108                                                             | 1.318                                                               |
| Crystal size/mm <sup>3</sup>                                  | 0.3 × 0.2 × 0.2                                                   | 0.6 × 0.2 × 0.2                                                   | 0.4 × 0.2 × 0.2                                                     |
| Radiation                                                     | MoK $\alpha$ ( $\lambda$ = 0.71073)                               | MoK $\alpha$ ( $\lambda$ = 0.71073)                               | MoK $\alpha$ ( $\lambda$ = 0.71073)                                 |
| $\theta_{\text{min}}$ , $\theta_{\text{max}}$ , deg           | 4.666, 55.088                                                     | 4.772, 61.266                                                     | 4.544, 55.122                                                       |
| Final <i>R</i> indexes [ <i>I</i> >= 2 $\sigma$ ( <i>I</i> )] | <i>R</i> <sub>1</sub> = 0.0257                                    | <i>R</i> <sub>1</sub> = 0.0211                                    | <i>R</i> <sub>1</sub> = 0.0410                                      |
| Final <i>R</i> indexes [all data]                             | <i>wR</i> <sub>2</sub> = 0.0673                                   | <i>wR</i> <sub>2</sub> = 0.0526                                   | <i>wR</i> <sub>2</sub> = 0.1028                                     |

### ***Ab Initio* Calculations**

OpenMolcas [34] was used to perform the CASSCF-SO calculation of the electronic structures of **1-3** with the molecular geometries taken from the crystallographic analyses; no optimization was made except for taking the largest disorder component. Relativistic effects have been accounted for by using the 2<sup>nd</sup> order Douglas-Kroll Hess Hamiltonian, and the basis sets from ANO-RCC library [35-36] were accordingly employed, with VTZP quality for Er atoms, VDZP quality for the coordinating C atoms, and VDZ quality for any remaining atoms. Cholesky decomposition of the two-electron integrals with a threshold of  $10^{-8}$  was performed to save disk space and to reduce computational demand. The molecular orbitals were optimized in state-averaged CASSCF calculations within each spin manifold, with a minimal active space of 11 electrons in 7 orbitals and considering 35 and 112 roots for spin quartet and doublet, respectively. For each spin multiplicity, the number of states mixed by spin orbit coupling are also 35 and 112, respectively. The resulting spin-orbit wavefunctions were decomposed into their CF wavefunctions, and the magnetic susceptibility was calculated using SINGLE\_ANISO [37].

**Table S6.** Electronic structure of **1** calculated with the crystal field parameters obtained from CASSCF-SO at the crystal structure. Each row corresponds to a Kramers doublet. Last column reports the original CASSCF-SO energies.

| Energy<br>(cm <sup>-1</sup> ) | Energy<br>(K) | $g_x$                 | $g_y$                 | $g_z$ | Wavefunction                         |
|-------------------------------|---------------|-----------------------|-----------------------|-------|--------------------------------------|
| 0.00                          | 0.00          | $1.14 \times 10^{-5}$ | $1.60 \times 10^{-5}$ | 17.94 | 99.9%  $\pm 15/2$                    |
| 126.09                        | 181.32        | 10.07                 | 9.05                  | 1.22  | 99.5%  $\pm 1/2$                     |
| 197.22                        | 283.60        | 0.17                  | 0.26                  | 11.00 | 61.6%  $\pm 13/2$ + 37.3%  $\pm 3/2$ |
| 208.05                        | 299.18        | 0.22                  | 0.40                  | 8.20  | 61.3%  $\pm 3/2$ + 38.0%  $\pm 13/2$ |
| 327.74                        | 471.29        | 0.06                  | 0.19                  | 6.11  | 97.5%  $\pm 5/2$                     |
| 393.11                        | 565.29        | 0.005                 | 0.008                 | 12.85 | 94.1%  $\pm 11/2$ + 5.3 %  $\pm 7/2$ |
| 445.82                        | 641.09        | 0.03                  | 0.12                  | 8.77  | 92.4%  $\pm 7/2$ + 5.6%  $\pm 11/2$  |
| 480.92                        | 691.56        | 0.04                  | 0.10                  | 10.82 | 97.5%  $\pm 9/2$                     |

**Table S7.** Electronic structure of **2** calculated with the crystal field parameters obtained from CASSCF-SO at the crystal structure. Each row corresponds to a Kramers doublet. Last column reports the original CASSCF-SO energies.

| Energy<br>(cm <sup>-1</sup> ) | Energy<br>(K) | $g_x$                 | $g_y$                 | $g_z$ | Wavefunction                             |
|-------------------------------|---------------|-----------------------|-----------------------|-------|------------------------------------------|
| 0.00                          | 0.00          | $1.30 \times 10^{-4}$ | $1.44 \times 10^{-4}$ | 17.94 | 99.8%  $\pm 15/2$ )                      |
| 150.69                        | 216.69        | 10.34                 | 8.76                  | 1.22  | 99.0%  $\pm 1/2$ )                       |
| 180.80                        | 259.99        | 0.07                  | 0.08                  | 15.20 | 97.0%  $\pm 13/2$ ) + 2.5%  $\pm 3/2$ )  |
| 227.75                        | 327.50        | 0.49                  | 0.95                  | 3.97  | 96.2%  $\pm 3/2$ ) + 2.6%  $\pm 13/2$ )  |
| 344.91                        | 495.98        | 0.02                  | 0.46                  | 6.10  | 97.9%  $\pm 5/2$ )                       |
| 378.76                        | 544.66        | 0.04                  | 0.04                  | 12.99 | 97.2%  $\pm 11/2$ ) + 1.7 %  $\pm 7/2$ ) |
| 451.93                        | 649.88        | 0.11                  | 0.44                  | 8.51  | 95.5%  $\pm 7/2$ ) + 1.8%  $\pm 11/2$ )  |
| 476.14                        | 684.69        | 0.20                  | 0.35                  | 10.74 | 98.7%  $\pm 9/2$ )                       |

**Table S8.** Electronic structure of **3** calculated with the crystal field parameters obtained from CASSCF-SO at the crystal structure. Each row corresponds to a Kramers doublet. Last column reports the original CASSCF-SO energies.

| Energy<br>(cm <sup>-1</sup> ) | Energy<br>(K) | $g_x$                 | $g_y$                 | $g_z$ | Wavefunction                             |
|-------------------------------|---------------|-----------------------|-----------------------|-------|------------------------------------------|
| 0.00                          | 0.00          | $4.75 \times 10^{-4}$ | $1.38 \times 10^{-3}$ | 17.90 | 99.3%  $\pm 15/2$ )                      |
| 126.59                        | 181.32        | 9.99                  | 9.02                  | 1.30  | 97%  $\pm 1/2$ ) + 1.1%  $\pm 3/2$ )     |
| 165.94                        | 283.60        | 0.23                  | 0.27                  | 13.13 | 79.1%  $\pm 13/2$ ) + 18.6%  $\pm 3/2$ ) |
| 205.46                        | 299.18        | 0.11                  | 0.40                  | 6.00  | 78.5%  $\pm 3/2$ ) + 29.3%  $\pm 13/2$ ) |
| 306.33                        | 471.29        | 0.24                  | 0.62                  | 6.31  | 92.4%  $\pm 5/2$ ) + 2.7%  $\pm 7/2$ )   |
| 352.92                        | 565.29        | 0.14                  | 0.21                  | 12.78 | 94.3%  $\pm 11/2$ ) + 2.9 %  $\pm 7/2$ ) |
| 403.93                        | 641.09        | 0.08                  | 0.51                  | 10.75 | 75%  $\pm 7/2$ ) + 22.2%  $\pm 9/2$ )    |
| 448.05                        | 691.56        | 0.16                  | 0.27                  | 13.94 | 75.3%  $\pm 9/2$ ) + 19.7%  $\pm 7/2$ )  |

## Magnetic Studies

Magnetic susceptibility measurements were carried out with a Quantum Design MPMS-3 SQUID magnetometer in a field of 0.1 T and at between 2 and 300 K. In a typical measurement, a polycrystalline sample was sealed with melted eicosane in an NMR tube under vacuum. The standard AC magnetic susceptibility data collected with a 3.5-Oe oscillating AC field.

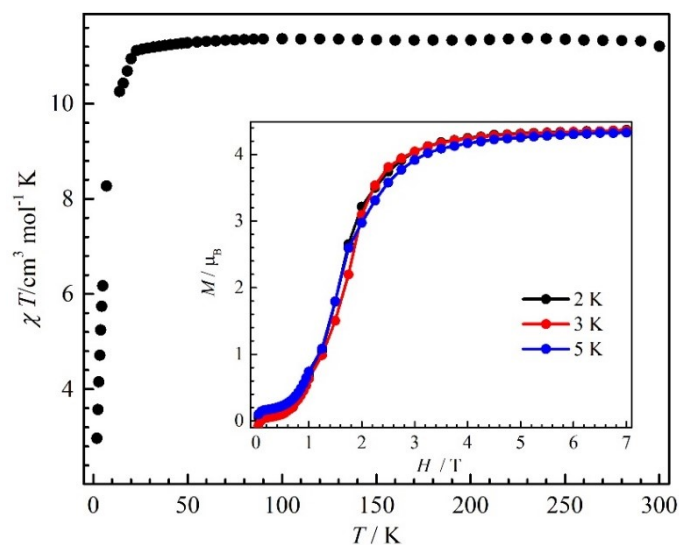

**Figure S2** The  $\chi T$  versus  $T$  plot of **1** under 1000 Oe dc field. Inset: The field-dependent magnetization plots at indicated temperatures.

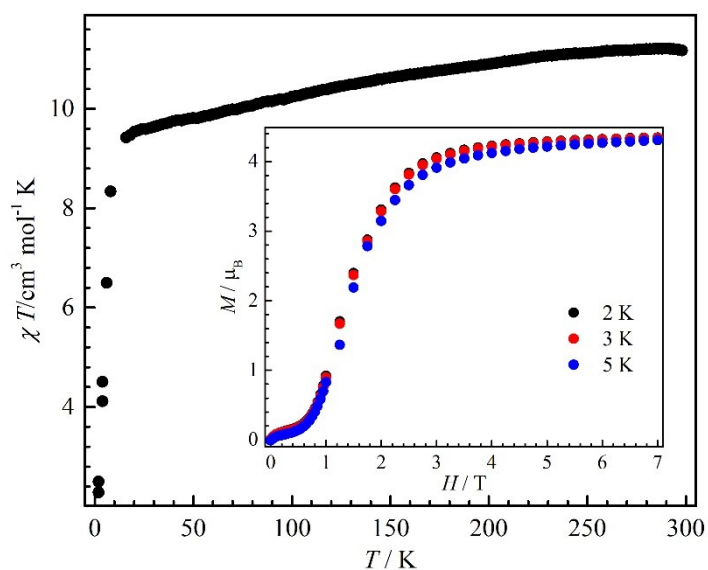

**Figure S3** The  $\chi T$  versus  $T$  plot of **2** under 1000 Oe dc field. Inset: The field-dependent magnetization plots at indicated temperatures.

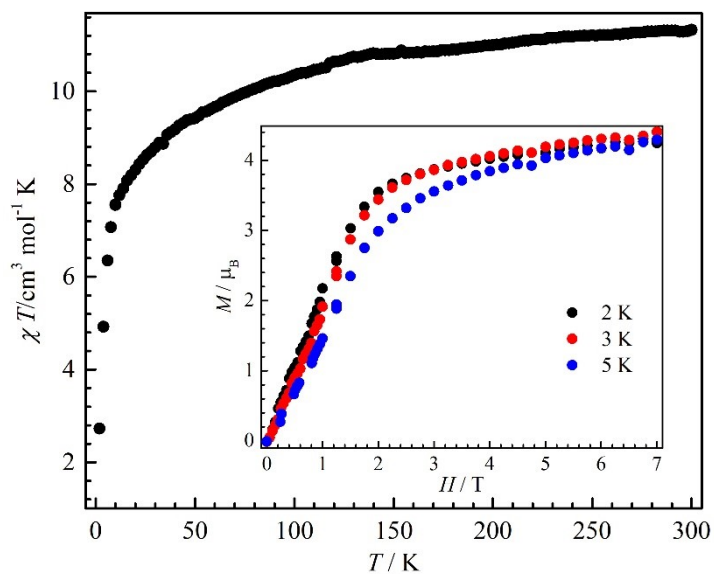

**Figure S4** The  $\chi T$  versus  $T$  plot of **3** under 1000 Oe dc field. Inset: The field-dependent magnetization plots at indicated temperatures.

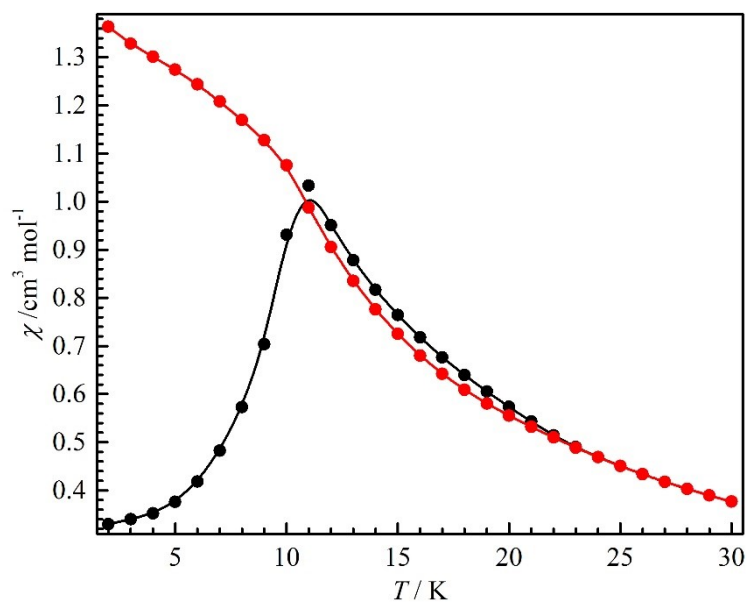

**Figure S5** Field-cooled (FC) and zero-field-cooled (ZFC) magnetization data for **1**.

Solid lines are guides for vision.

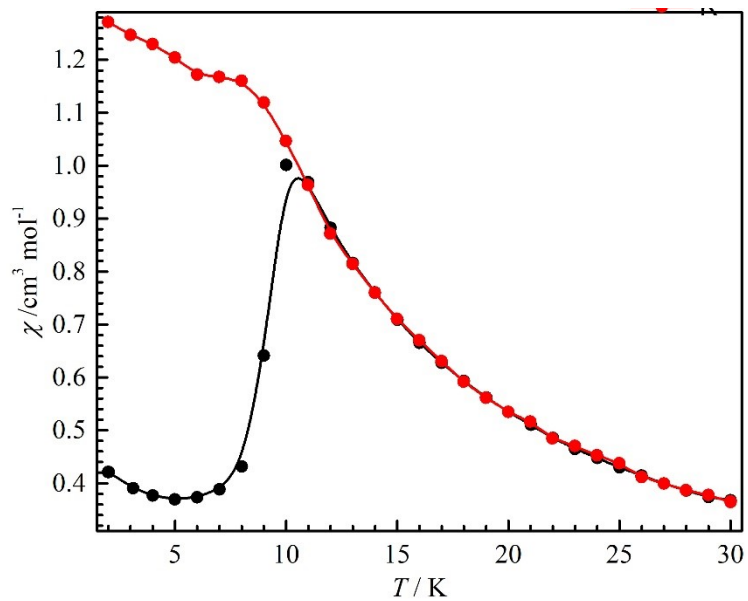

**Figure S6** Field-cooled (FC) and zero-field-cooled (ZFC) magnetization data for **2**.

Solid lines are guides for vision.

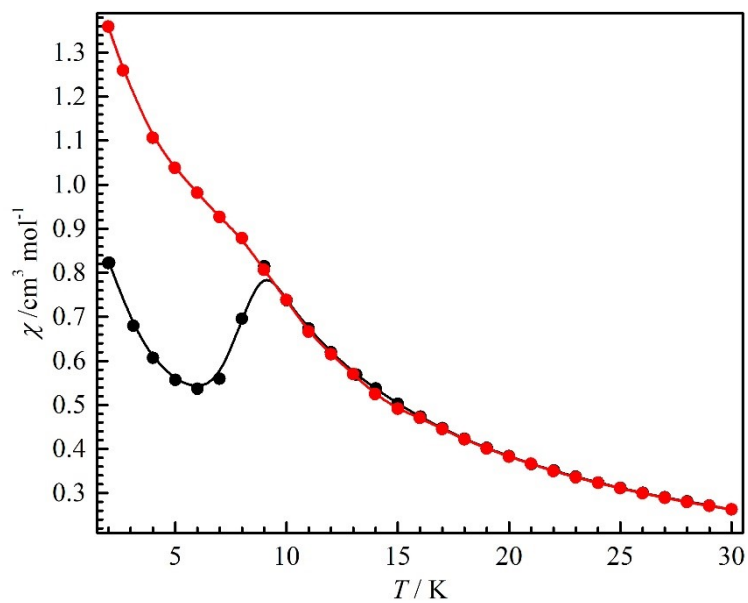

**Figure S7** Field-cooled (FC) and zero-field-cooled (ZFC) magnetization data for **3**.

Solid lines are guides for vision.



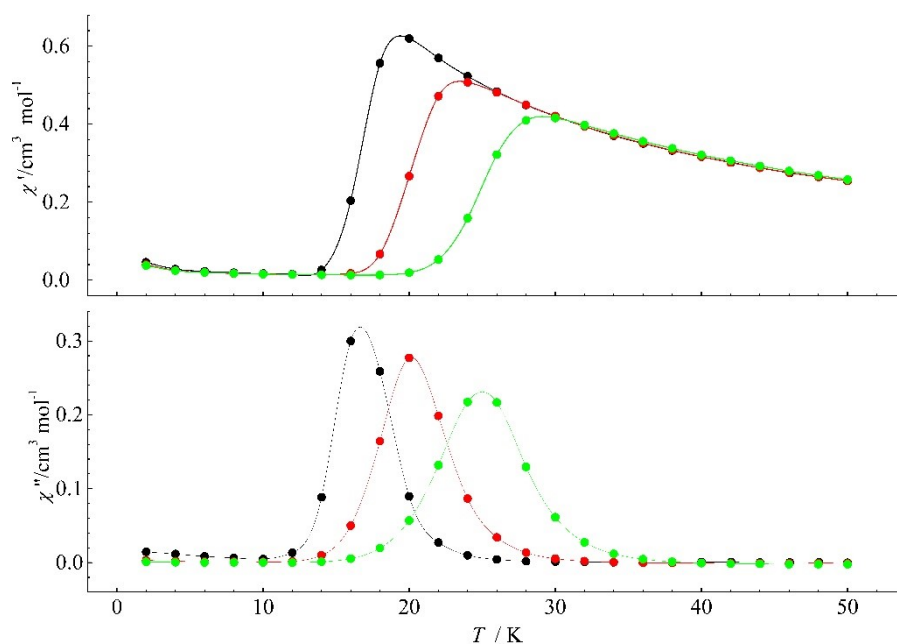

**Figure S8** Temperature-dependence of the in-phase ( $\chi'$ , top) and out-of-phase ( $\chi''$ , bottom) AC susceptibility signals under zero DC field by standard AC susceptibility measurements for **1** at frequencies of 7 Hz (black), 77 Hz (red) and 777 Hz (green). Solid lines are guide for vision.

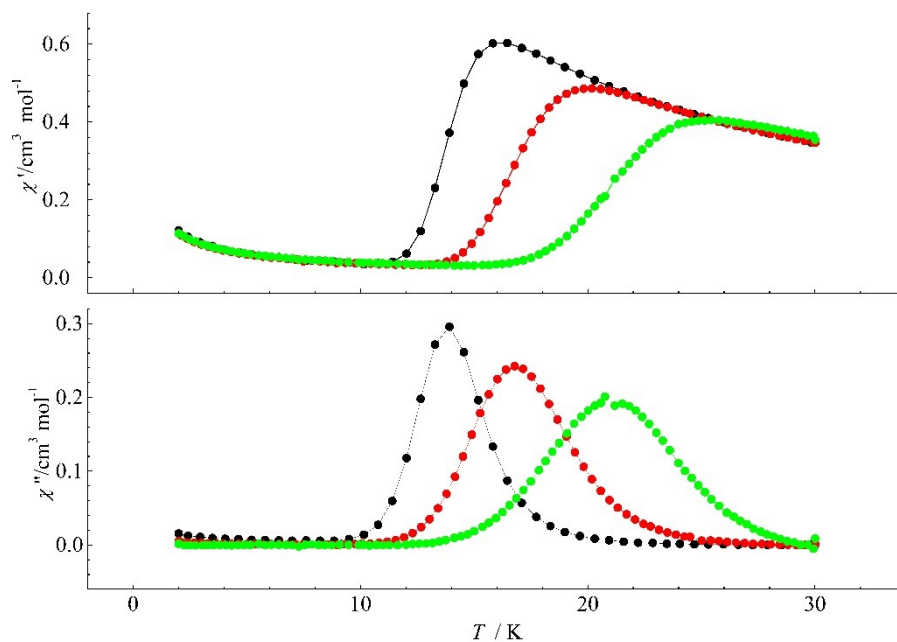

**Figure S9** Temperature-dependence of the in-phase ( $\chi'$ , top) and out-of-phase ( $\chi''$ , bottom) AC susceptibility signals under zero DC field by standard AC susceptibility measurements for **2** at frequencies of 7 Hz (black), 77 Hz (red) and 777 Hz (green). Solid lines are guide for vision.

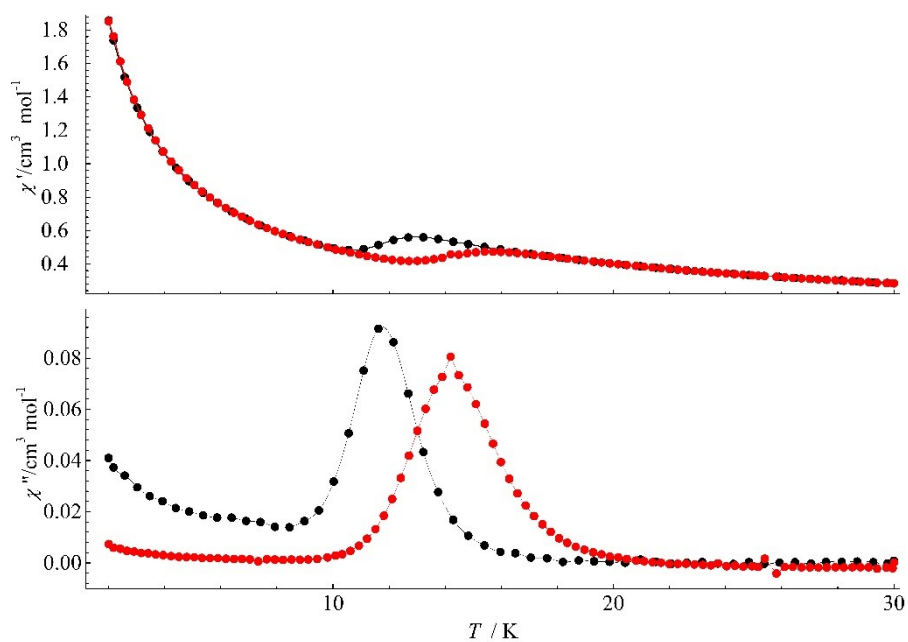

**Figure S10** Temperature-dependence of the in-phase ( $\chi'$ , top) and out-of-phase ( $\chi''$ , bottom) AC susceptibility signals under zero DC field by standard AC susceptibility measurements for **3** at frequencies of 7 Hz (black) and 77 Hz (red). Solid lines are guide for vision.

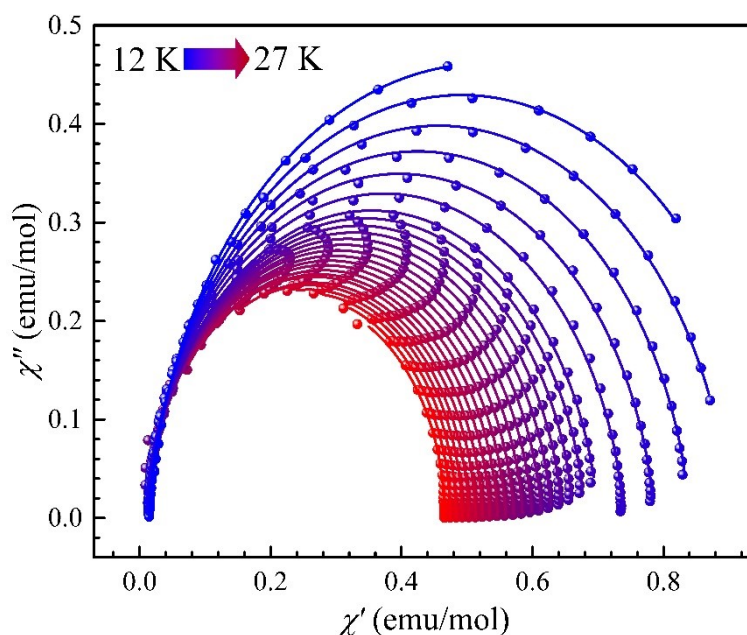

**Figure S11** Cole–Cole plots using the frequency-dependence ac susceptibility data under the zero dc field for **1** from 12 K (blue) to 27 K (red). The solid lines are the best fits.

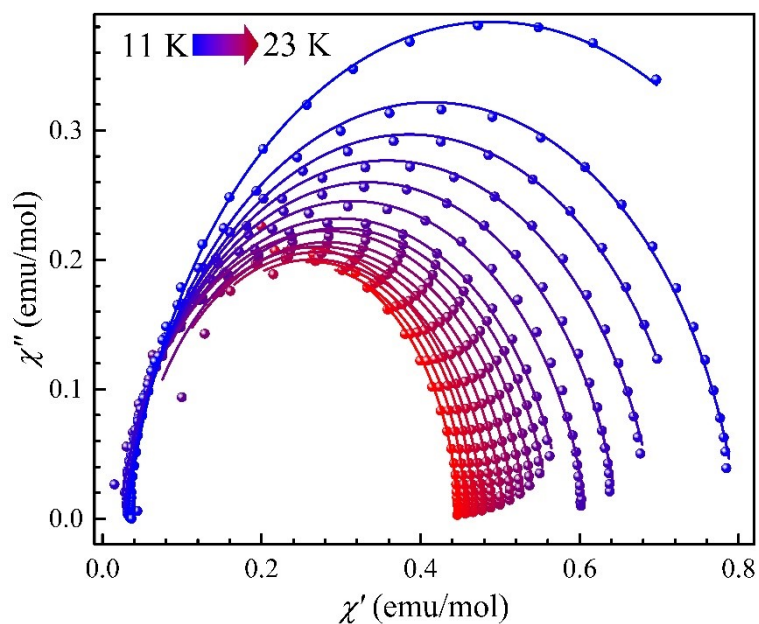

**Figure S12** Cole–Cole plots using the frequency-dependence ac susceptibility data under the zero dc field for **2** from 11 K (blue) to 23 K (red). The solid lines are the best fits.

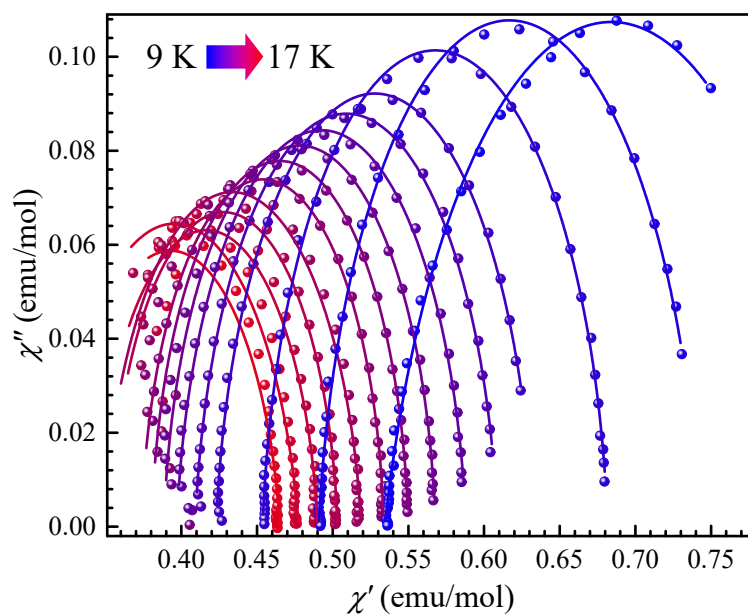

**Figure S13** Cole–Cole plots using the frequency-dependence ac susceptibility data under the zero dc field for **3** from 9 K (blue) to 17 K (red). The solid lines are the best fits.

**Table S9** Relaxation fitting parameters obtained using a generalized Debye model for **1** from 27 K to 12 K under zero dc field, fitted with the waveform module as implemented in CCFIT2.

| $T / \text{K}$ | $\tau / \text{s}$ | $\tau_{\text{err}}$ | $\alpha$   |
|----------------|-------------------|---------------------|------------|
| 27             | 1.06646E-4        | 5.41243E-6          | 0          |
| 26.5           | 1.28812E-4        | 2.95016E-6          | 7.35444E-4 |
| 26             | 1.59788E-4        | 3.40453E-6          | 1.64573E-4 |
| 25.5           | 1.94012E-4        | 2.95885E-6          | 0.00734    |
| 25             | 2.33317E-4        | 2.08517E-6          | 0.0183     |
| 24.5           | 2.8995E-4         | 2.01837E-6          | 0.02184    |
| 24             | 3.52685E-4        | 2.69955E-6          | 0.03131    |
| 23.5           | 4.42302E-4        | 1.91214E-6          | 0.03499    |
| 23             | 5.55059E-4        | 2.26681E-6          | 0.0387     |
| 22.5           | 6.93842E-4        | 2.83885E-6          | 0.04573    |
| 22             | 8.82589E-4        | 3.08535E-6          | 0.04791    |
| 21.5           | 0.00113           | 3.5054E-6           | 0.05073    |
| 21             | 0.00144           | 5.88952E-6          | 0.05687    |
| 20.5           | 0.00188           | 6.48972E-6          | 0.05613    |
| 20             | 0.00246           | 8.82654E-6          | 0.06009    |
| 19.5           | 0.00326           | 1.05618E-5          | 0.06071    |
| 19             | 0.00435           | 1.44209E-5          | 0.06357    |
| 18.5           | 0.00589           | 2.02534E-5          | 0.06352    |
| 18             | 0.00809           | 2.76747E-5          | 0.06536    |
| 17             | 0.01585           | 6.21672E-5          | 0.0672     |
| 16             | 0.03377           | 1.22191E-4          | 0.06913    |
| 15             | 0.07891           | 2.75726E-4          | 0.07105    |
| 14             | 0.20421           | 6.96632E-4          | 0.07295    |
| 13             | 0.5842            | 0.00211             | 0.07083    |
| 12             | 1.7909            | 0.06509             | 0.00997    |

**Table S10** Relaxation fitting parameters obtained using a generalized Debye model for **2** from 24 K to 11 K under zero dc field, fitted with the waveform module as implemented in CCFIT2.

| $T / \text{K}$ | $\tau / \text{s}$ | $\tau_{\text{err}}$ | $\alpha$ |
|----------------|-------------------|---------------------|----------|
| 23             | 1.07842E-4        | 6.78278E-6          | 0.02425  |
| 22.5           | 1.49595E-4        | 1.02803E-5          | 0.00821  |
| 22             | 1.86232E-4        | 1.17676E-5          | 0.05809  |
| 21.5           | 1.98836E-4        | 1.00544E-5          | 0.05809  |
| 21             | 2.52186E-4        | 2.95885E-6          | 0.00734  |
| 20.5           | 3.251E-4          | 4.52482E-6          | 0.07943  |
| 20             | 3.98529E-4        | 5.6993E-6           | 0.10194  |
| 19.5           | 5.2858E-4         | 7.34195E-6          | 0.09977  |
| 19             | 6.71548E-4        | 9.21223E-6          | 0.1097   |
| 18.5           | 9.1751E-4         | 1.38009E-5          | 0.10678  |
| 18             | 0.00119           | 8.92652E-6          | 0.12365  |
| 17             | 0.00223           | 1.45231E-5          | 0.11589  |
| 16             | 0.00456           | 2.35033E-5          | 0.11904  |
| 15             | 0.01018           | 5.91089E-5          | 0.12505  |
| 14             | 0.02544           | 1.82772E-4          | 0.12247  |
| 13             | 0.07019           | 3.79463E-4          | 0.11439  |
| 11             | 0.83004           | 0.01332             | 0.11166  |

**Table S11** Relaxation fitting parameters obtained using a generalized Debye model for **3** from 18 K to 8 K under zero dc field, fitted with the waveform module as implemented in CCFIT2.

| $T / \text{K}$ | $\tau / \text{s}$ | $\tau_{\text{err}}$ | $\alpha$ |
|----------------|-------------------|---------------------|----------|
| 17             | 2.38299E-4        | 2.18928E-5          | 0.13101  |
| 16.5           | 3.04248E-4        | 2.6967E-5           | 0.15307  |
| 16             | 5.45331E-4        | 2.58798E-5          | 0.09739  |
| 15.5           | 8.20836E-4        | 2.92002E-5          | 0.07386  |
| 15             | 0.00109           | 6.08788E-5          | 0.11492  |
| 14.5           | 0.00187           | 4.84428E-5          | 0.05054  |
| 14             | 0.00283           | 6.50209E-5          | 0.05494  |
| 13.5           | 0.00439           | 7.0078E-5           | 0.06465  |
| 13             | 0.00705           | 5.72535E-5          | 0.07928  |
| 12.5           | 0.01172           | 6.75337E-5          | 0.08227  |
| 12             | 0.02053           | 1.33141E-4          | 0.08212  |
| 11             | 0.06574           | 2.85588E-4          | 0.07485  |
| 10             | 0.2222            | 0.00111             | 0.09915  |
| 9              | 0.75414           | 0.01016             | 0.20747  |

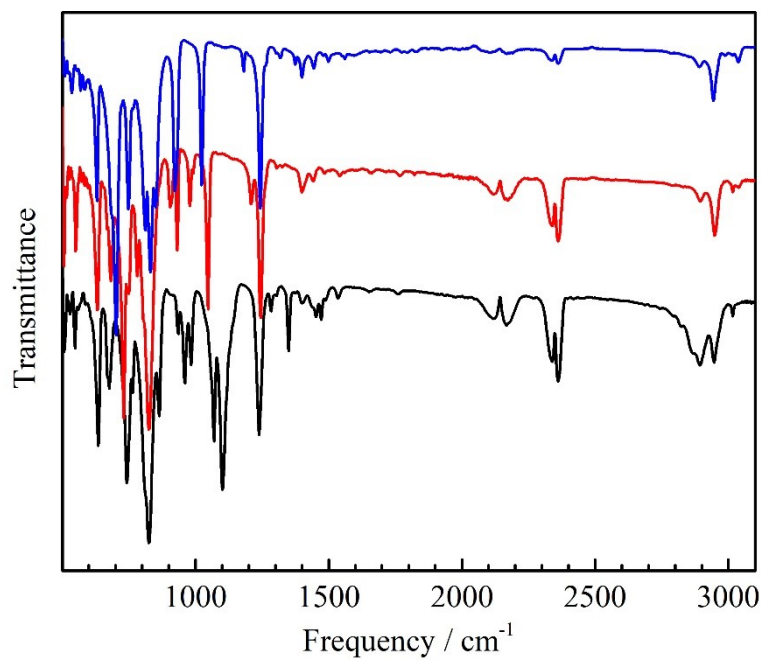

**Figure S14** Comparison of IR spectra for **1** (blue), **2** (red) and **3** (black).

**Table S12** Experimental IR Absorption Frequencies ( $\text{cm}^{-1}$ ) and Vibrational Assignments for **1-3**.

| Absorption Frequencies / $\text{cm}^{-1}$ |              |              | Vibrational assignment                         |
|-------------------------------------------|--------------|--------------|------------------------------------------------|
| <b>1</b>                                  | <b>2</b>     | <b>3</b>     |                                                |
| 630                                       | 631<br>682   | 634<br>677   | TMS Si–C stretch [39]                          |
| 702<br>748                                | 731          | 744          | out-of-plane C–H bend + C–H bend<br>(TMS) [39] |
| 811<br>831                                | 825          | 825<br>863   | C–H bend (TMS) [39]                            |
| 925                                       | 931          | 935          | CCH bend (COT) [39]                            |
|                                           | 979          | 960<br>983   | sym Si–C stretch [39]                          |
| 1023                                      | 1047         | 1069         | asym Si–C stretch [39]                         |
| -                                         | -            | 1102         | C–O stretch (18-C-6) [40]                      |
| 1181                                      | 1210         | -            | C–C stretch (COT) [39]                         |
|                                           |              | 1350         |                                                |
| -                                         | -            | 1402<br>1452 | C–H bend (18-C-6) [40]                         |
| 1243                                      | 1244         | 1239         | CH <sub>3</sub> umbrella [39]                  |
| 2362<br>2335                              | 2362<br>2337 | 2362<br>2336 | CO <sub>2</sub> contaminant                    |
| 2892<br>2944                              | 2895<br>2949 | 2892<br>2946 | C–H stretch (alkane) [39]                      |
| 3037                                      | 3038         | 3016         | C–H stretch (COT) [39]                         |



## REFERENCES

- [1] K. R. Meihaus and J. R. Long, *J. Am. Chem. Soc.*, 2013, **135**, 17952-17957.
- [2] T.-J. Xue, Y.-S. Ding, D. Reta, Q.-W. Chen, X. Zhu and Z. Zheng, *Cryst. Growth Des.*, 2023, **23**, 565-573.
- [3] (a) S. D. Jiang, B. W. Wang, H. L. Sun, Z. M. Wang and S. Gao, *J. Am. Chem. Soc.*, 2011, **133**, 4730-4733. (b) S.-D. Jiang, S.-S. Liu, L.-N. Zhou, B.-W. Wang, Z.-M. Wang and S. Gao, *Inorg. Chem.*, 2012, **51**, 3079-3087.
- [4] L. Ungur, J. J. Le Roy, I. Korobkov, M. Murugesu and L. F. Chibotaru, *Angew. Chem. Int. Ed.*, 2014, **53**, 4413-4417.
- [5] J. J. Le Roy, L. Ungur, I. Korobkov, L. F. Chibotaru and M. Murugesu, *J. Am. Chem. Soc.*, 2014, **136**, 8003-8010.
- [6] Y. S. Meng, C. H. Wang, Y. Q. Zhang, X. B. Leng, B. W. Wang, Y. F. Chen and S. Gao, *Inorg. Chem. Front.*, 2016, **3**, 828-835.
- [7] J. D. Hilgar, B. S. Flores and J. D. Rinehart, *Chem. Commun.*, 2017, **53**, 7322-7324.
- [8] M. He, X. Chen, T. Bodenstern, A. Nyvang, S. F. M. Schmidt, Y. Peng, E. Moreno-Pineda, M. Ruben, K. Fink, M. T. Gamer, A. K. Powell and P. W. Roesky, *Organometallics*, 2018, **37**, 3708-3717.
- [9] S. M. Chen, J. Xiong, Y. Q. Zhang, Q. Yuan, B. W. Wang and S. Gao, *Chem. Sci.*, 2018, **9**, 7540-7545.
- [10] J. D. Hilgar, M. G. Bernbeck, B. S. Flores and J. D. Rinehart, *Chem. Sci.*, 2018, **9**, 7204-7209.
- [11] J. D. Hilgar, M. G. Bernbeck and J. D. Rinehart, *J. Am. Chem. Soc.*, 2019, **141**, 1913-1917.
- [12] Y.-S. Meng, M.-W. Yang, L. Xu, J. Xiong, J.-Y. Hu, T. Liu, B.-W. Wang and S. Gao, *Dalton Trans.*, 2019, **48**, 10407-10411.
- [13] L. Munzfeld, C. Schöo, S. Bestgen, E. Moreno-Pineda, R. Koppe, M. Ruben and P. W. Roesky, *Nat. Commun.*, 2019, **10**, 3135.
- [14] M. G. Bernbeck, J. D. Hilgar and J. D. Rinehart, *Polyhedron*, 2020, **175**, 114206.

- [15] D. Z. Zhu, M. M. Wang, L. L. Guo, W. Shi, J. F. Li and C. M. Cui, *Organometallics*, 2021, **40**, 2394-2399.
- [16] Z. Zhou, J. McNeely, J. Greenough, Z. Wei, H. Han, M. Rouzières, A. Y. Rogachev, R. Clérac and M. A. Petrukhina, *Chem. Sci.*, 2022, **13**, 3864-3874.
- [17] M. D. Korzyński, M. Bernhardt, V. Romankov, J. Dreiser, G. Matmon, F. Pointillart, B. Le Guennic, O. Cador and C. Copéret, *Chem. Sci.*, 2022., **13**, 10574-10580.
- [18] L. Münzfeld, M. Dahlen, A. Hauser, N. Mahieu, S. K. Kuppusamy, J. Moutet, M. Tricoire, R. Köppe, L. La Droitte, O. Cador, B. Le Guennic, G. Nocton, E. Moreno-Pineda, M. Ruben and P. W. Roesky, *Angew. Chem. Int. Ed.*, 2023, e202218107.
- [19] J. J. Le Roy, I. Korobkov and M. Murugesu, *Chem. Commun.*, 2014, **50**, 1602-1604.
- [20] L. Münzfeld, X. Sun, S. Schlittenhardt, C. Schoo, A. Hauser, S. Gillhuber, F. Weigend, M. Ruben and P. W. Roesky, *Chem. Sci.*, 2022, **13**, 945-954.
- [21] A. P. Orlova, J. D. Hilgar, M. G. Bernbeck, M. Gembicky and J. D. Rinehart, *J. Am. Chem. Soc.*, 2022, **144**, 11316-11325.
- [22] J. D. Hilgar, A. K. Butts and J. D. Rinehart, *Phys. Chem. Chem. Phys.*, 2019, **21**, 22302-22307.
- [23] W. Huang, B. M. Upton, S. I. Khan and P. L. Diaconescu, *Organometallics*, 2013, **32**, 1379-1386.
- [24] S. Majumder and A. L. Odom, *Tetrahedron Lett.*, 2008, **49**, 1771-1772.
- [25] J. Gasteiger, G. E. Gream, R. Huisgen, W. E. Konz and U. Schnegg, *Chem. Ber.*, 1971, **104**, 2412-2419.
- [26] A. de Meijere, C.-H. Lee, B. Bengtson, E. Pohl, S. I. Kozhushkov, P. R. Schreiner, R. Boese and T. Haumann, *Chem-Eur. J.*, 2003, **9**, 5481-5488.
- [27] N. C. Burton, F. G. N. Cloke, S. C. P. Joseph, H. Karamallakis and A. A. Sameh, *J. Organomet. Chem.*, 1993, **462**, 39-43.
- [28] T. J. Katz, *J. Am. Chem. Soc.*, 1960, **82**, 3784-3785.
- [29] V. Lorenz, P. Liebing, J. Rausch, S. Blaurock, C. G. Hrib, L. Hilfert and F. T. Edelman, *J. Organomet. Chem.*, 2018, **857**, 38-44.

- [30] V. Lorenz, P. Liebing, A. Bathelier, F. Engelhardt, L. Maron, L. Hilfert, S. Busse and F. T. Edelmann, *Chem Commun*, 2018, **54**, 10280-10283.
- [31] O. V. Dolomanov, L. J. Bourhis, R. J. Gildea, J. A. K. Howard and H. Puschmann, *J. Appl. Cryst.*, 2009, **42**, 339-341.
- [32] G. Sheldrick, *Acta Cryst. A.*, **2015**, *71*, 3-8.
- [33] G. Sheldrick, *Acta Cryst. C*, 2015, **71**, 3-8.
- [34] G. Li Manni, I. Fdez. Galván, A. Alavi, F. Aleotti, F. Aquilante, J. Autschbach, D. Avagliano, A. Baiardi, J. J. Bao, S. Battaglia, L. Birnoschi, A. Blanco-González, S. I. Bokarev, R. Broer, R. Cacciari, P. B. Calio, R. K. Carlson, R. Carvalho Couto, L. Cerdán, L. F. Chibotaru, N. F. Chilton, J. R. Church, I. Conti, S. Coriani, J. Cuéllar-Zuquin, R. E. Daoud, N. Dattani, P. Decleva, C. de Graaf, M. G. Delcey, L. De Vico, W. Dobrautz, S. S. Dong, R. Feng, N. Ferré, M. Filatov, L. Gagliardi, M. Garavelli, L. González, Y. Guan, M. Guo, M. R. Hennefarth, M. R. Hermes, C. E. Hoyer, M. Huix-Rotllant, V. K. Jaiswal, A. Kaiser, D. S. Kaliakin, M. Khamesian, D. S. King, V. Kochetov, M. Krośnicki, A. A. Kumaar, E. D. Larsson, S. Lehtola, M.-B. Lepetit, H. Lischka, P. López Ríos, M. Lundberg, D. Ma, S. Mai, P. Marquetand, I. C. D. Merritt, F. Montorsi, M. Mörchen, A. Nenov, V. H. A. Nguyen, Y. Nishimoto, M. S. Oakley, M. Olivucci, M. Oppel, D. Padula, R. Pandharkar, Q. M. Phung, F. Plasser, G. Raggi, E. Rebolini, M. Reiher, I. Rivalta, D. Roca-Sanjuán, T. Romig, A. A. Safari, A. Sánchez-Mansilla, A. M. Sand, I. Schapiro, T. R. Scott, J. Segarra-Martí, F. Segatta, D.-C. Sergentu, P. Sharma, R. Shepard, Y. Shu, J. K. Staab, T. P. Straatsma, L. K. Sørensen, B. N. C. Tenorio, D. G. Truhlar, L. Ungur, M. Vacher, V. Veryazov, T. A. Voß, O. Weser, D. Wu, X. Yang, D. Yarkony, C. Zhou, J. P. Zobel and R. Lindh, *J. Chem. Theory. Comput.*, 2023, DOI: 10.1021/acs.jctc.3c00182.
- [35] B. O. Roos, R. Lindh, P. A. Malmqvist, V. Veryazov and P. O. Widmark, *J Phys Chem A*, 2004, **108**, 2851-2858.
- [36] B. O. Roos, R. Lindh, P. A. Malmqvist, V. Veryazov and P. O. Widmark, *J Phys Chem A*, 2005, **109**, 6575-6579.
- [37] L. Ungur and L. F. Chibotaru, *Chem-Eur J*, 2017, **23**, 3708-3718.
- [38] D. Reta and N. F. Chilton, *Phys Chem Chem Phys*, 2019, **21**, 23567-23575.

[39] T. Tsuji, N. Hosoya, S. Fukazawa, R. Sugiyama, T. Iwasa, H. Tsunoyama, H. Hamaki, N. Tokitoh and A. Nakajima, *J. Phys. Chem. C*, 2014, **118**, 5896-5907.

[40] G. W. Gokel, D. J. Cram, C. L. Liotta, H. P. Harris and F. L. Cook, *J. Org. Chem.*, 1974, **39**, 2445-2446.
